# Supplementary material
Source: publisher figshare collection journal article supplement (https://acs.figshare.com/ndownloader/files/5906364)
Supplement: Supplementary file 1 [file 5906364]

## Supporting Information

for

### Intramolecular Photocycloaddition Reactions of Arylcyclopropane Tethered 1-Cyanonaphthalenes

Hajime Maeda,\* Shoji Matsuda, and Kazuhiko Mizuno\*

Department of Applied Chemistry, Graduate School of Engineering, Osaka Prefecture University, 1-1 Gakuen-cho, Naka-ku, Sakai, Osaka 599-8531, Japan

## Contents

|                                                                           |        |
|---------------------------------------------------------------------------|--------|
| <sup>1</sup> H and <sup>13</sup> C NMR spectra of <b>1a</b>               | p. S2  |
| <sup>1</sup> H and <sup>13</sup> C NMR spectra of <b>1b</b>               | p. S3  |
| <sup>1</sup> H and <sup>13</sup> C NMR spectra of <b>2a</b>               | p. S4  |
| <sup>1</sup> H and <sup>13</sup> C NMR spectra of <i>endo</i> - <b>3a</b> | p. S5  |
| <sup>1</sup> H and <sup>13</sup> C NMR spectra of <i>endo</i> - <b>3b</b> | p. S6  |
| <sup>1</sup> H and <sup>13</sup> C NMR spectra of <i>exo</i> - <b>3a</b>  | p. S7  |
| <sup>1</sup> H and <sup>13</sup> C NMR spectra of <i>exo</i> - <b>3b</b>  | p. S8  |
| <sup>1</sup> H and <sup>13</sup> C NMR spectra of <b>4a</b>               | p. S9  |
| <sup>1</sup> H and <sup>13</sup> C NMR spectra of <b>4b</b>               | p. S10 |
| <sup>1</sup> H and <sup>13</sup> C NMR spectra of <b>5a</b>               | p. S11 |
| <sup>1</sup> H and <sup>13</sup> C NMR spectra of <b>5b</b>               | p. S12 |
| <sup>1</sup> H and <sup>13</sup> C NMR spectra of <b>6a</b>               | p. S13 |
| X-ray crystallographic analysis                                           | p. S14 |
| ORTEP plot of X-ray crystallographic data of <b>2a</b>                    | p. S15 |
| ORTEP plot of X-ray crystallographic data of <i>endo</i> - <b>3a</b>      | p. S16 |
| ORTEP plot of X-ray crystallographic data of <i>exo</i> - <b>3a</b>       | p. S17 |
| ORTEP plot of X-ray crystallographic data of <b>5a</b>                    | p. S18 |
| ORTEP plot of X-ray crystallographic data of <b>6a</b>                    | p. S19 |

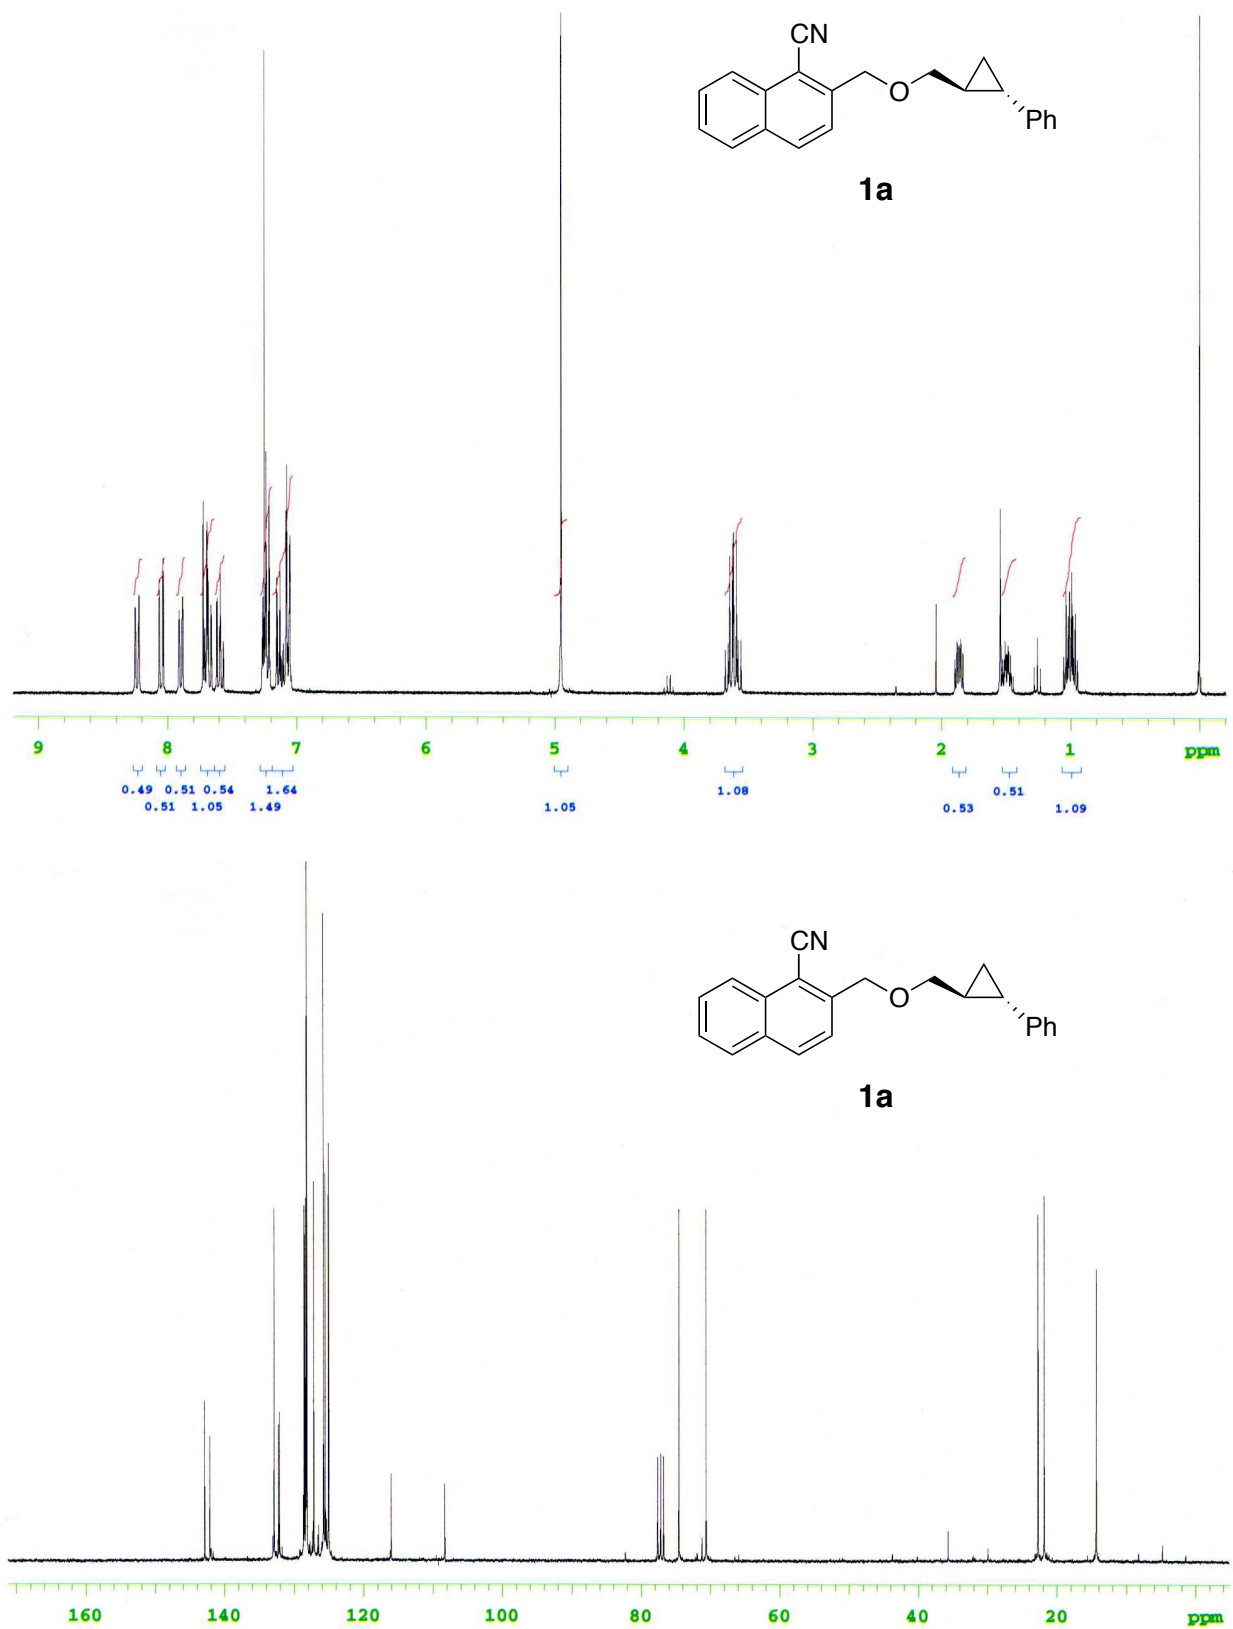

**Figure S1.** <sup>1</sup>H and <sup>13</sup>C NMR spectra of **1a** in CDCl<sub>3</sub>.

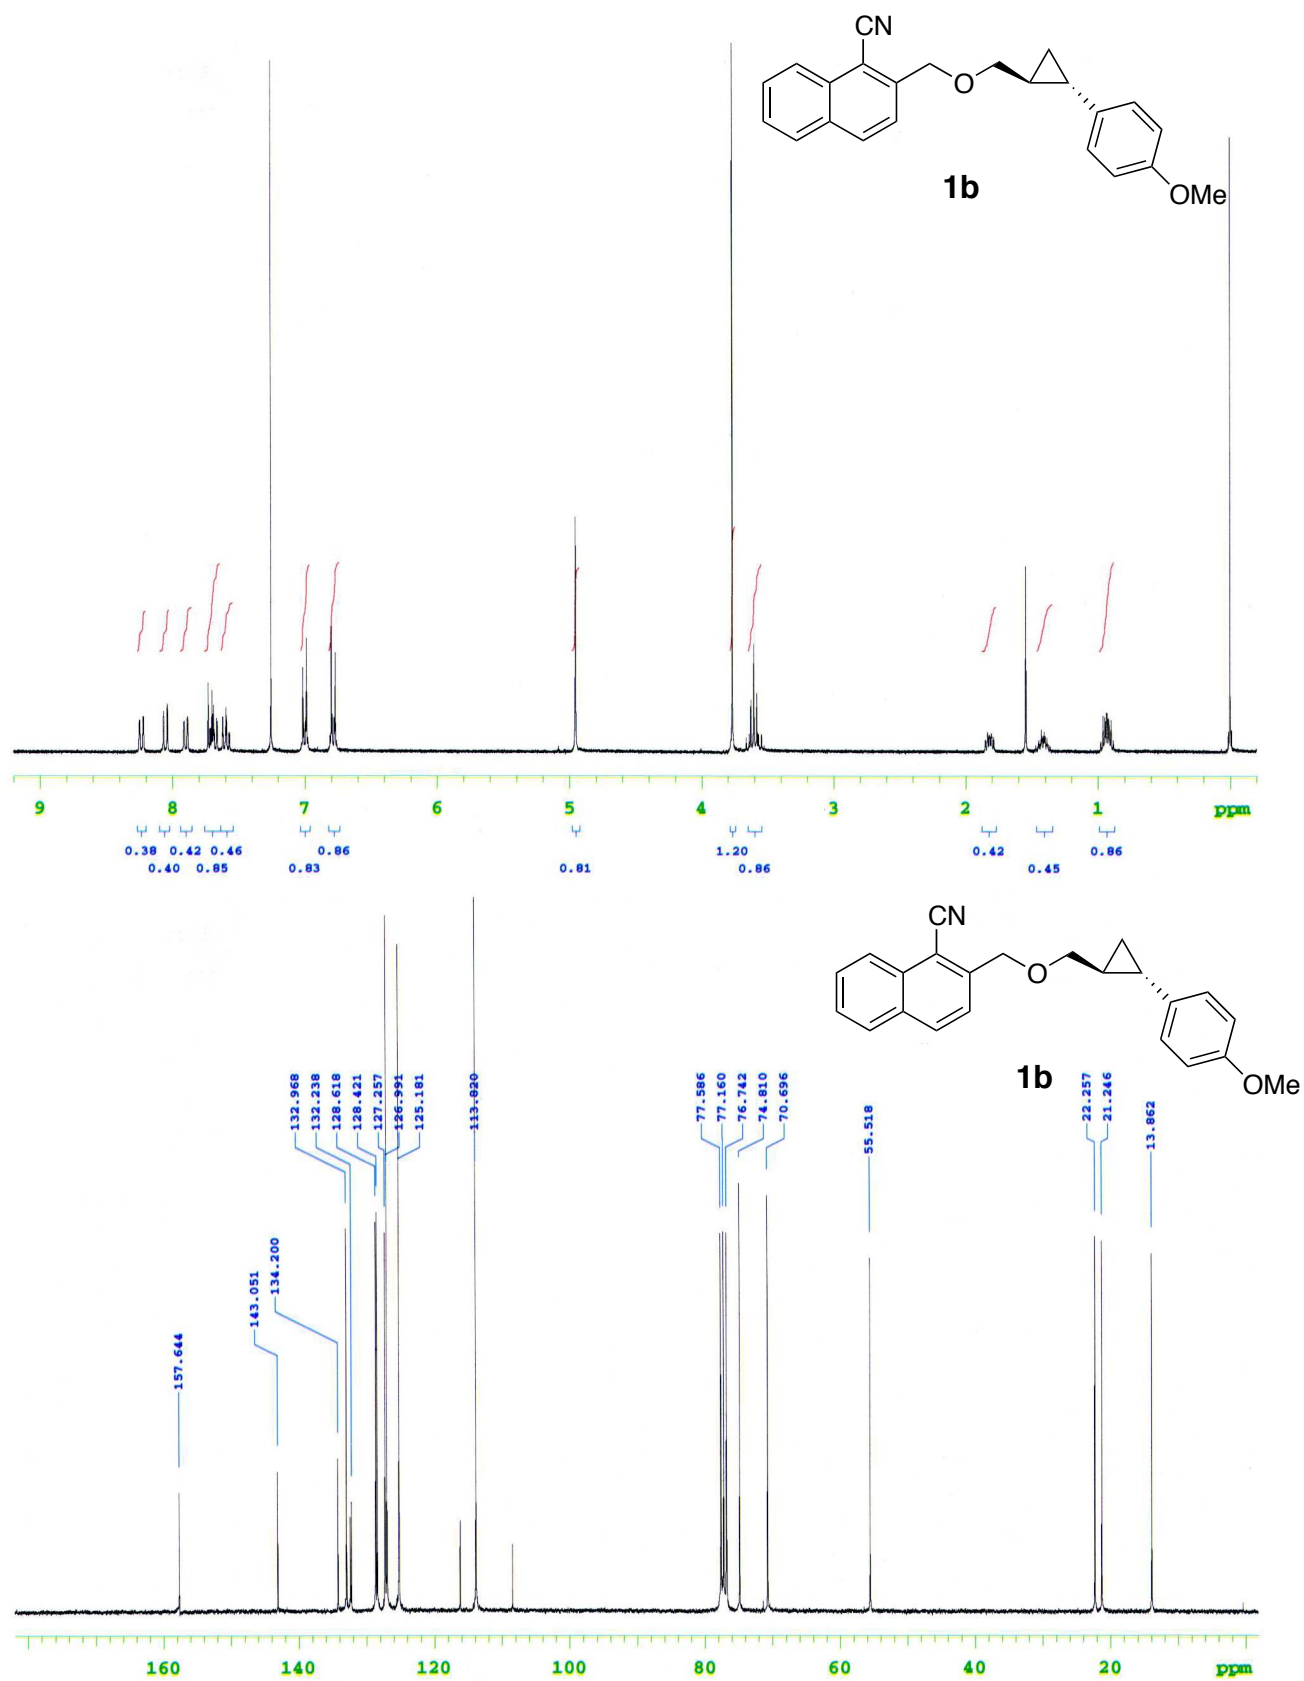

Figure S2. <sup>1</sup>H and <sup>13</sup>C NMR spectra of **1b** in CDCl<sub>3</sub>.



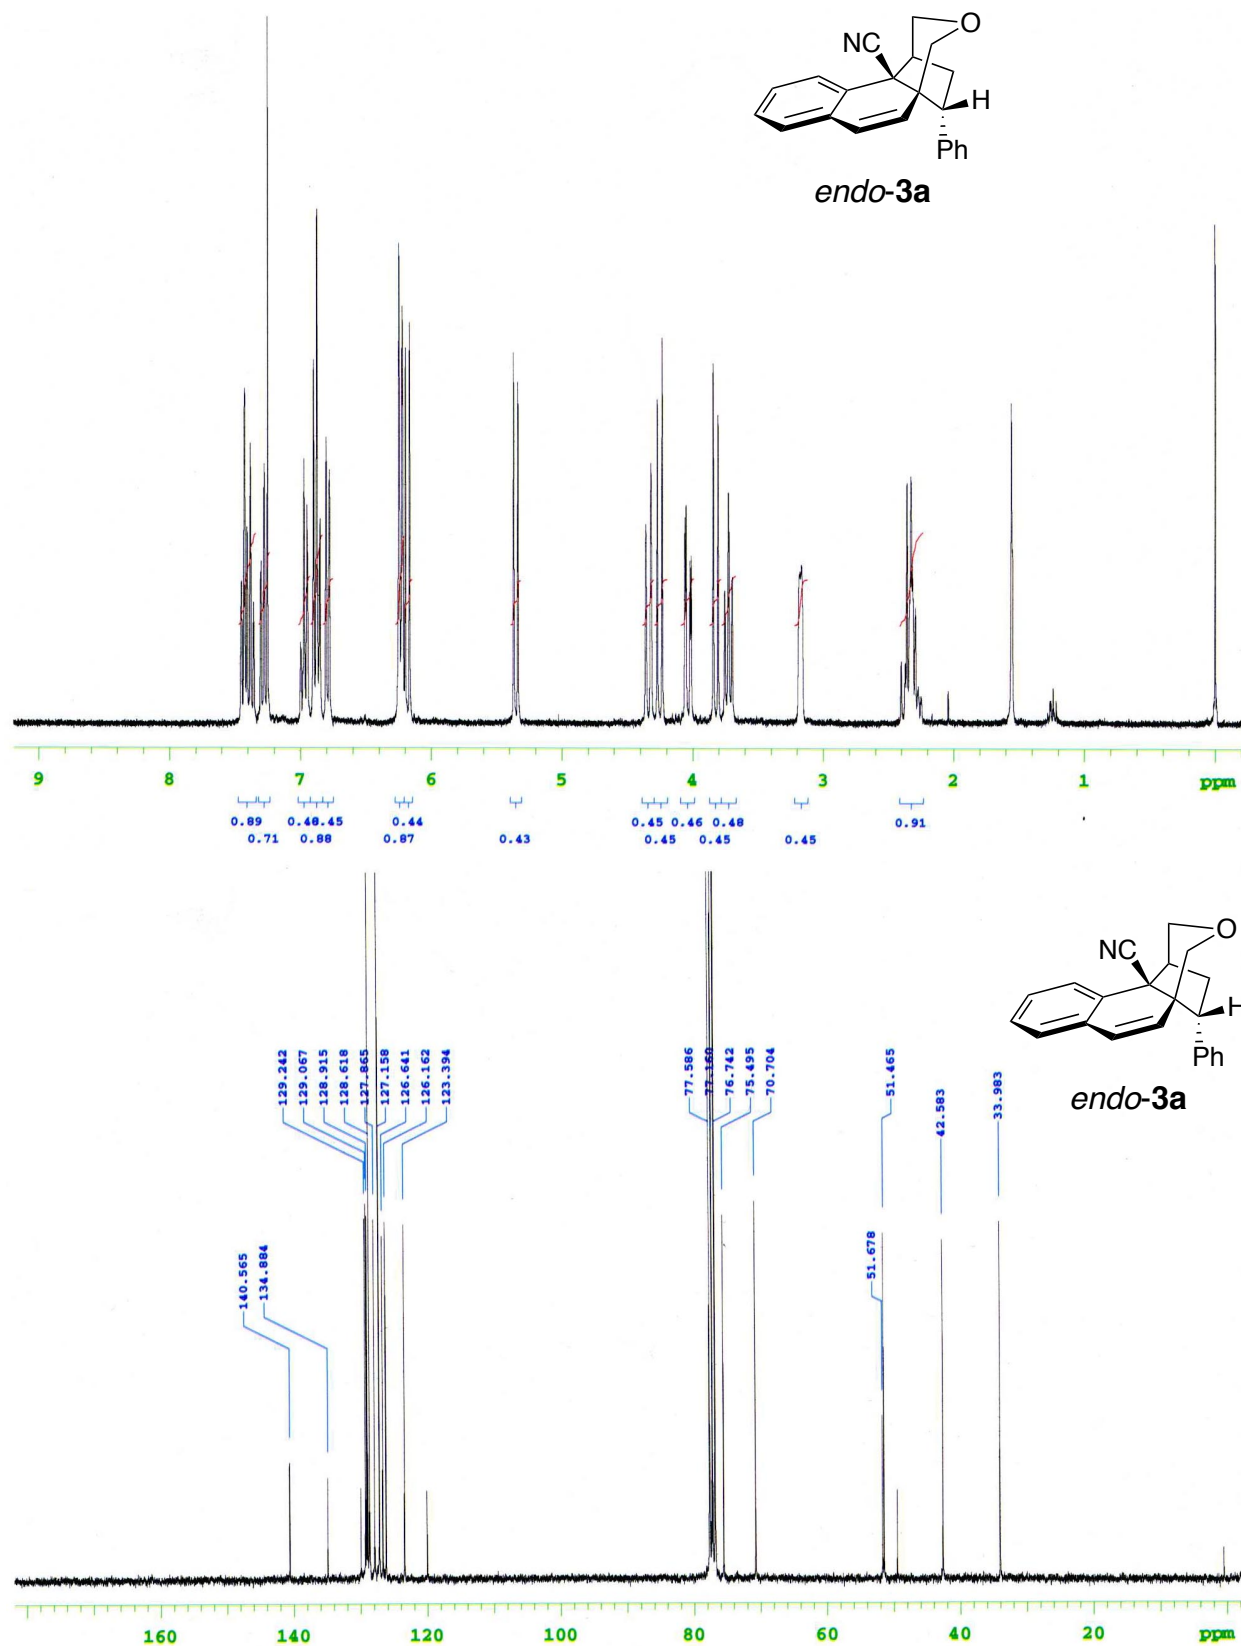

**Figure S4.** <sup>1</sup>H and <sup>13</sup>C NMR spectra of *endo-3a* in CDCl<sub>3</sub>.

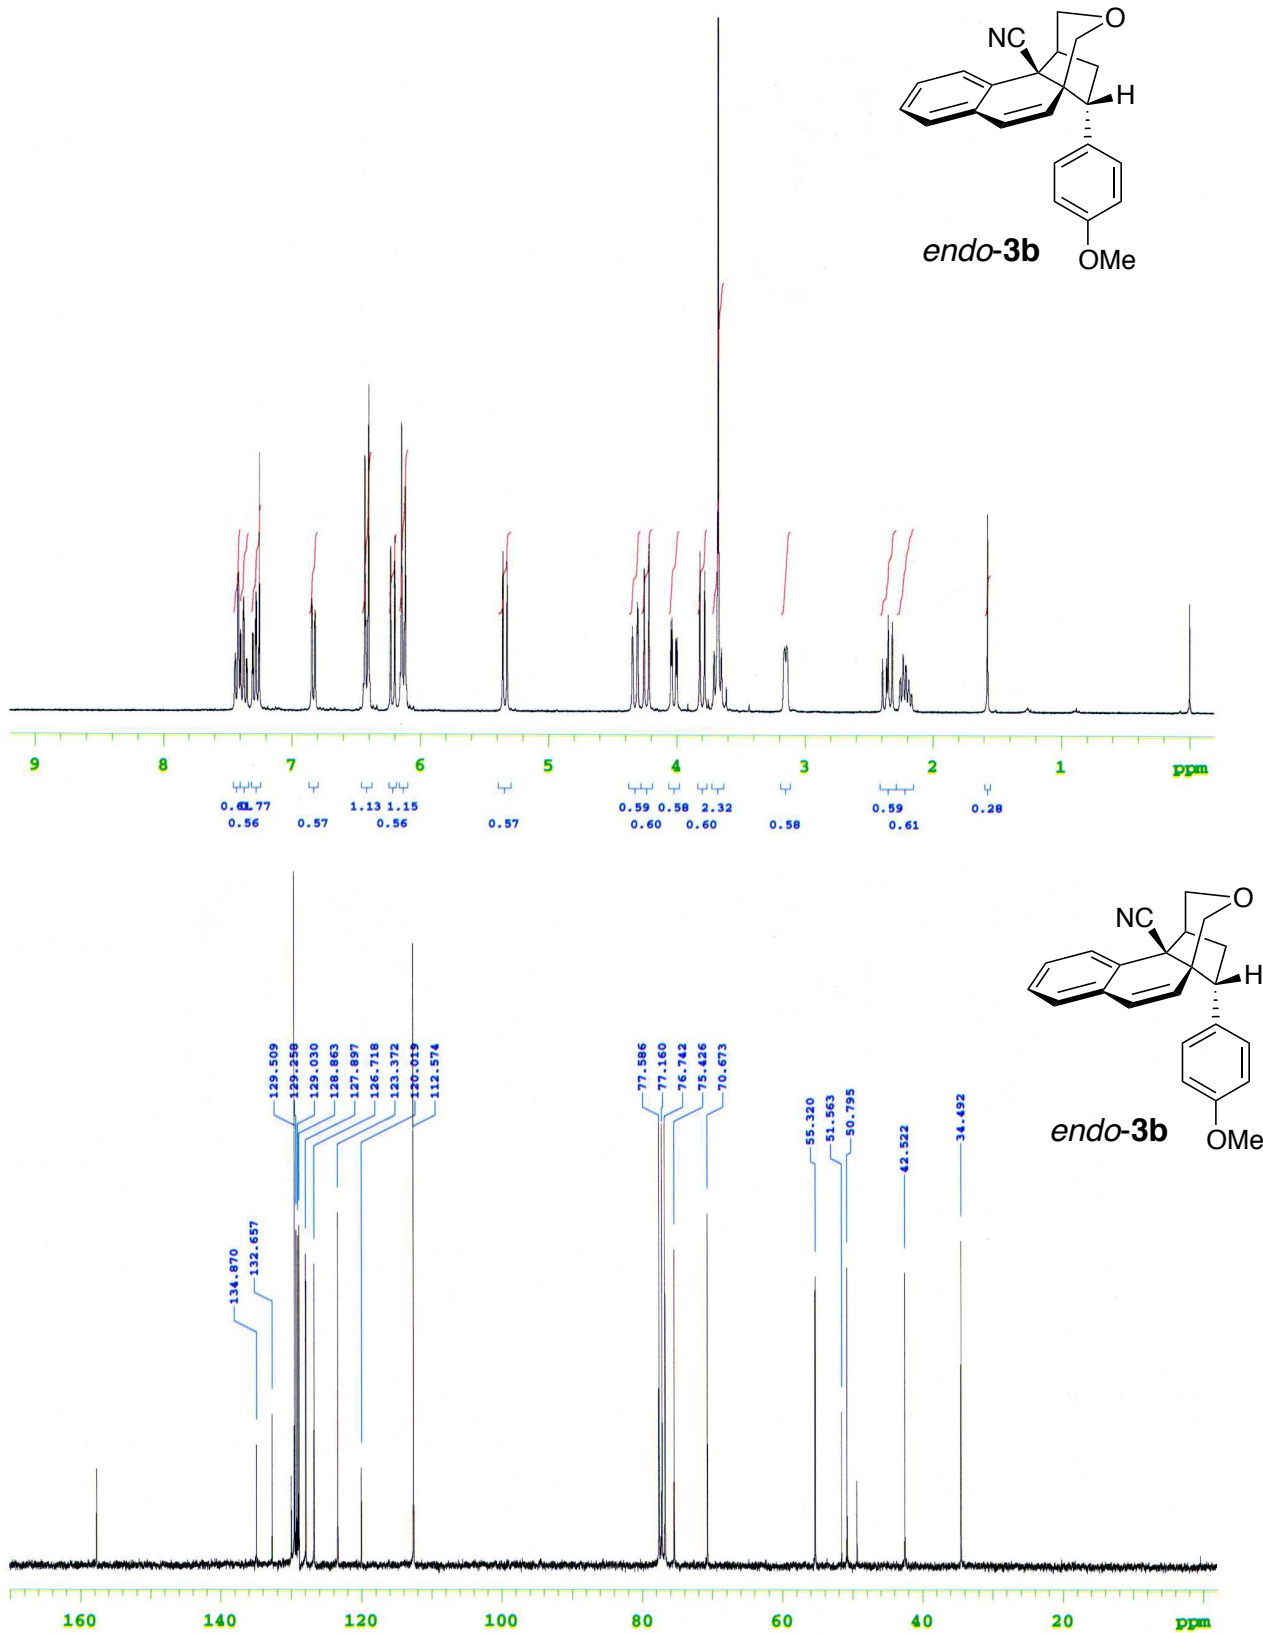

**Figure S5.** <sup>1</sup>H and <sup>13</sup>C NMR spectra of *endo-3b* in CDCl<sub>3</sub>.

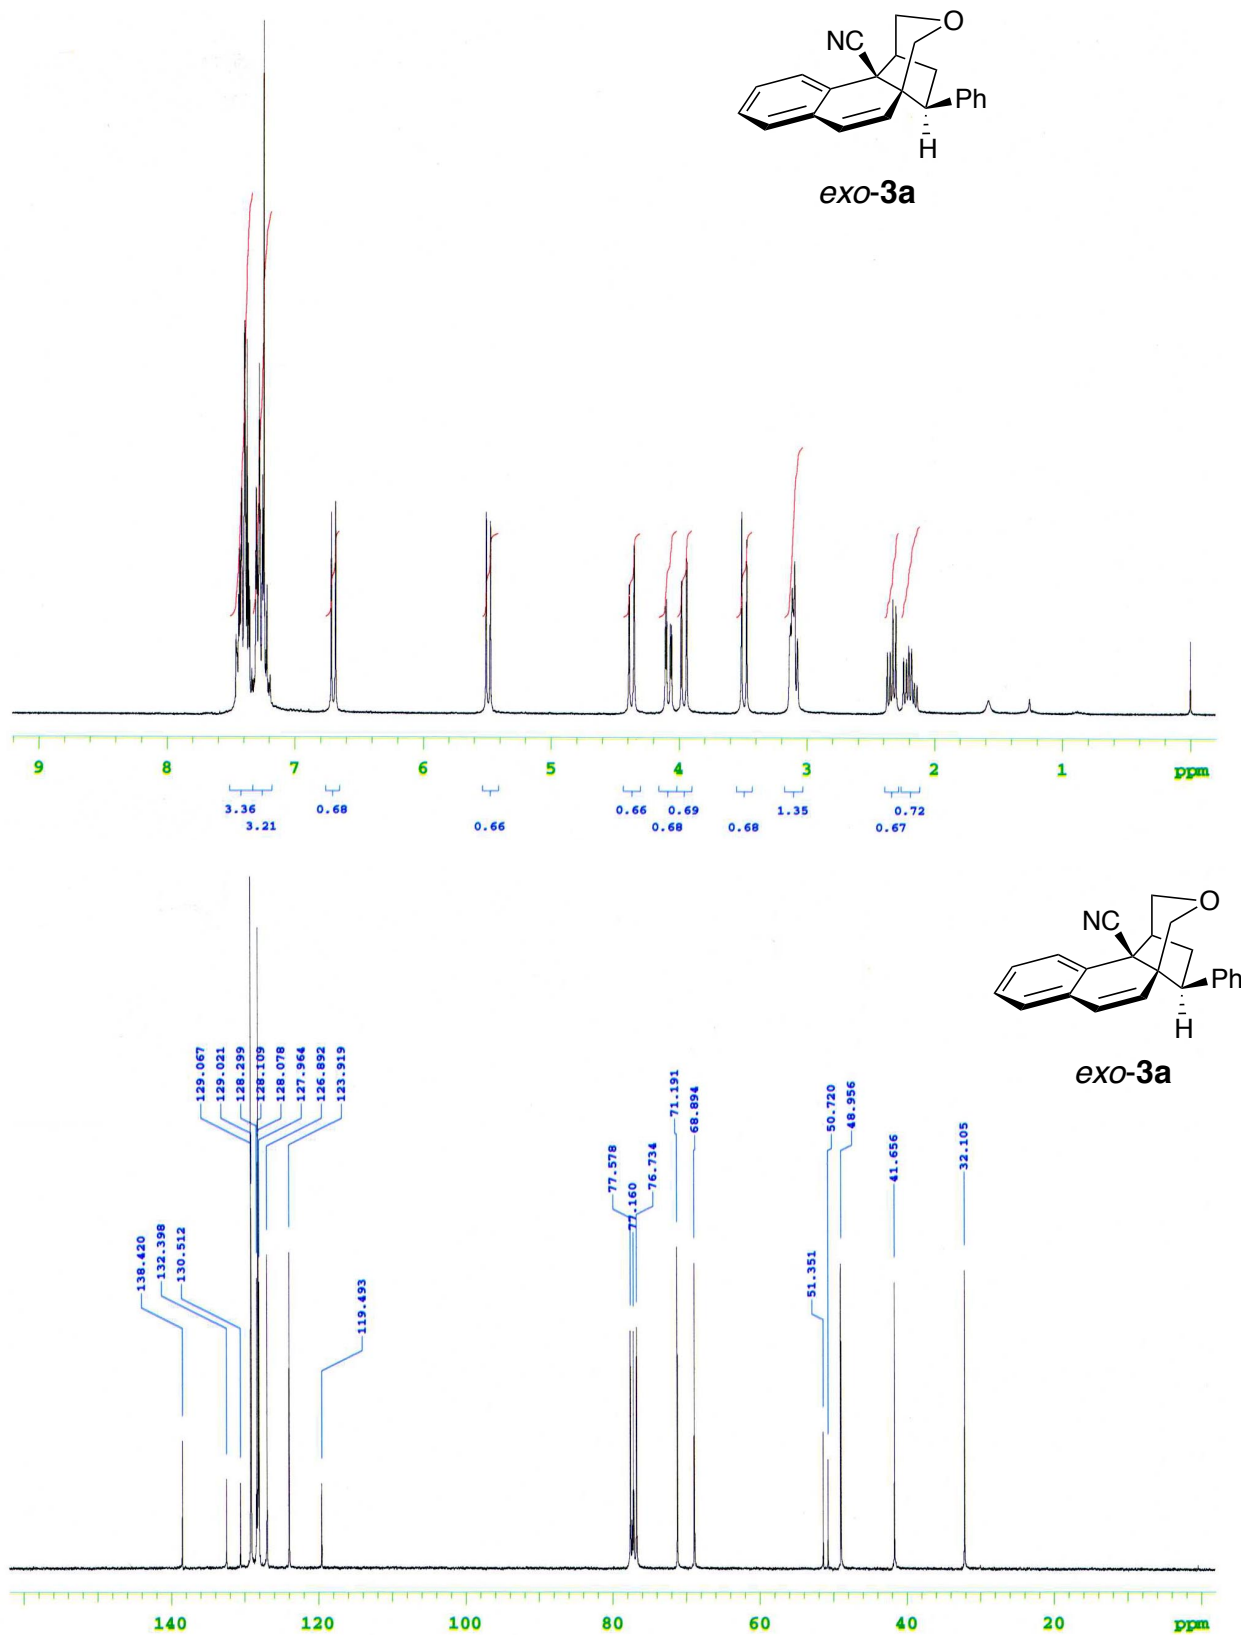

**Figure S6.** <sup>1</sup>H and <sup>13</sup>C NMR spectra of *exo-3a* in CDCl<sub>3</sub>.

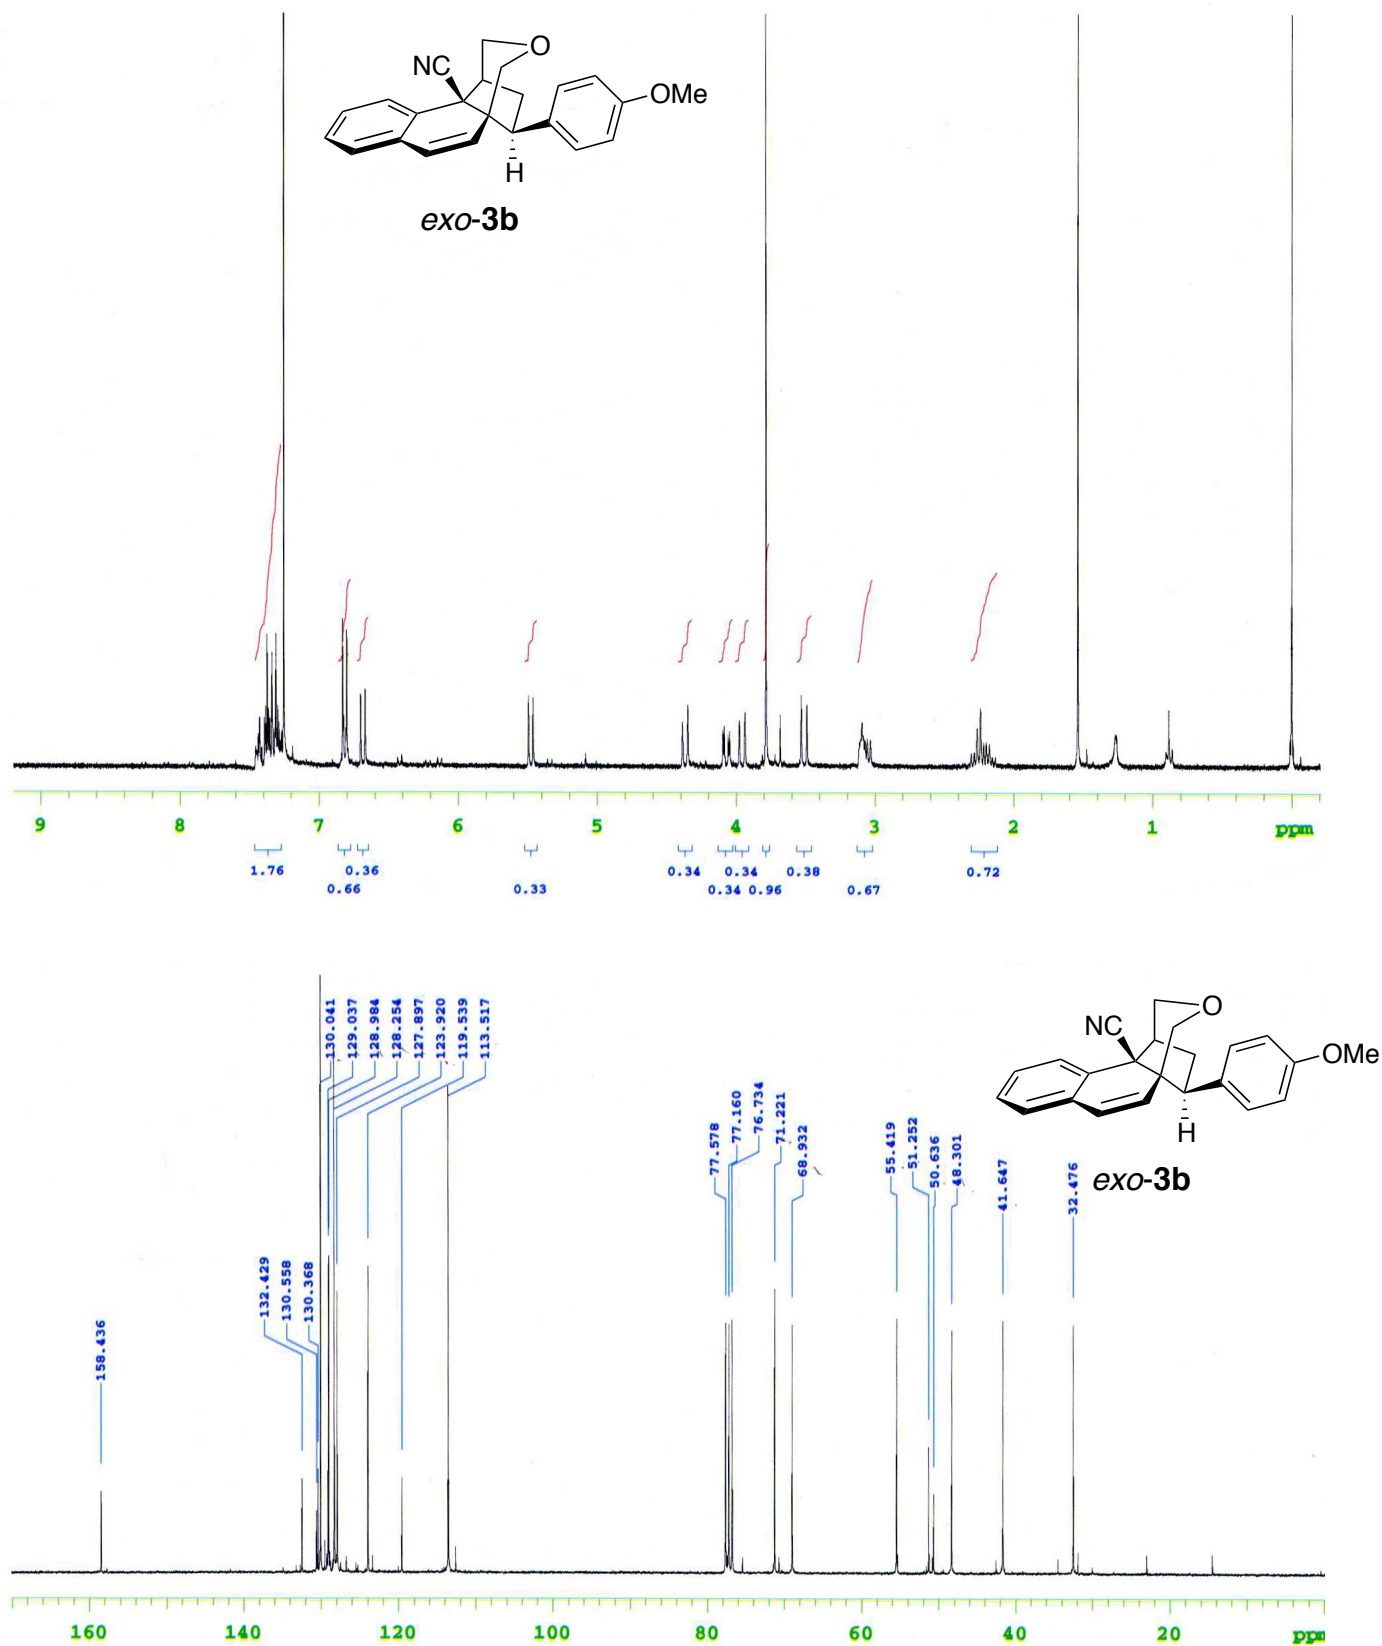

Figure S7. <sup>1</sup>H and <sup>13</sup>C NMR spectra of *exo-3b* in CDCl<sub>3</sub>.



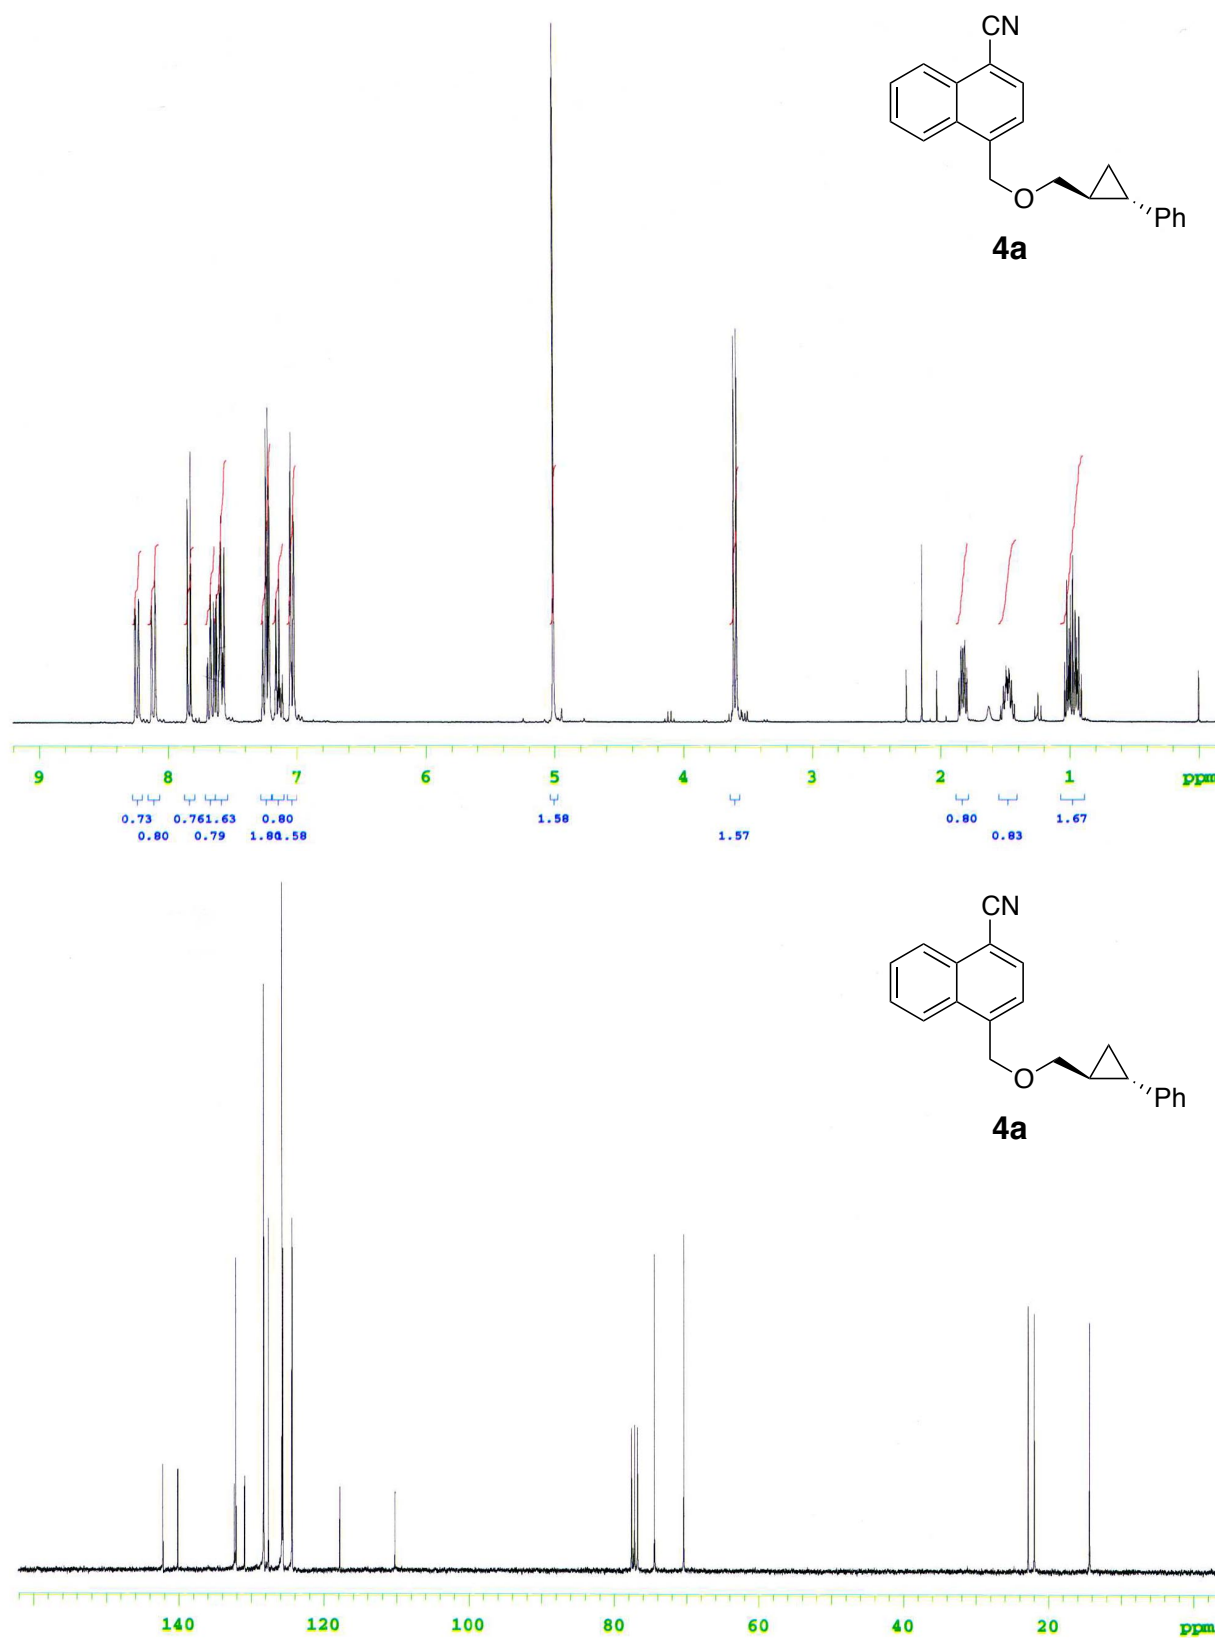

**Figure S8.**  $^1\text{H}$  and  $^{13}\text{C}$  NMR spectra of **4a** in  $\text{CDCl}_3$ .

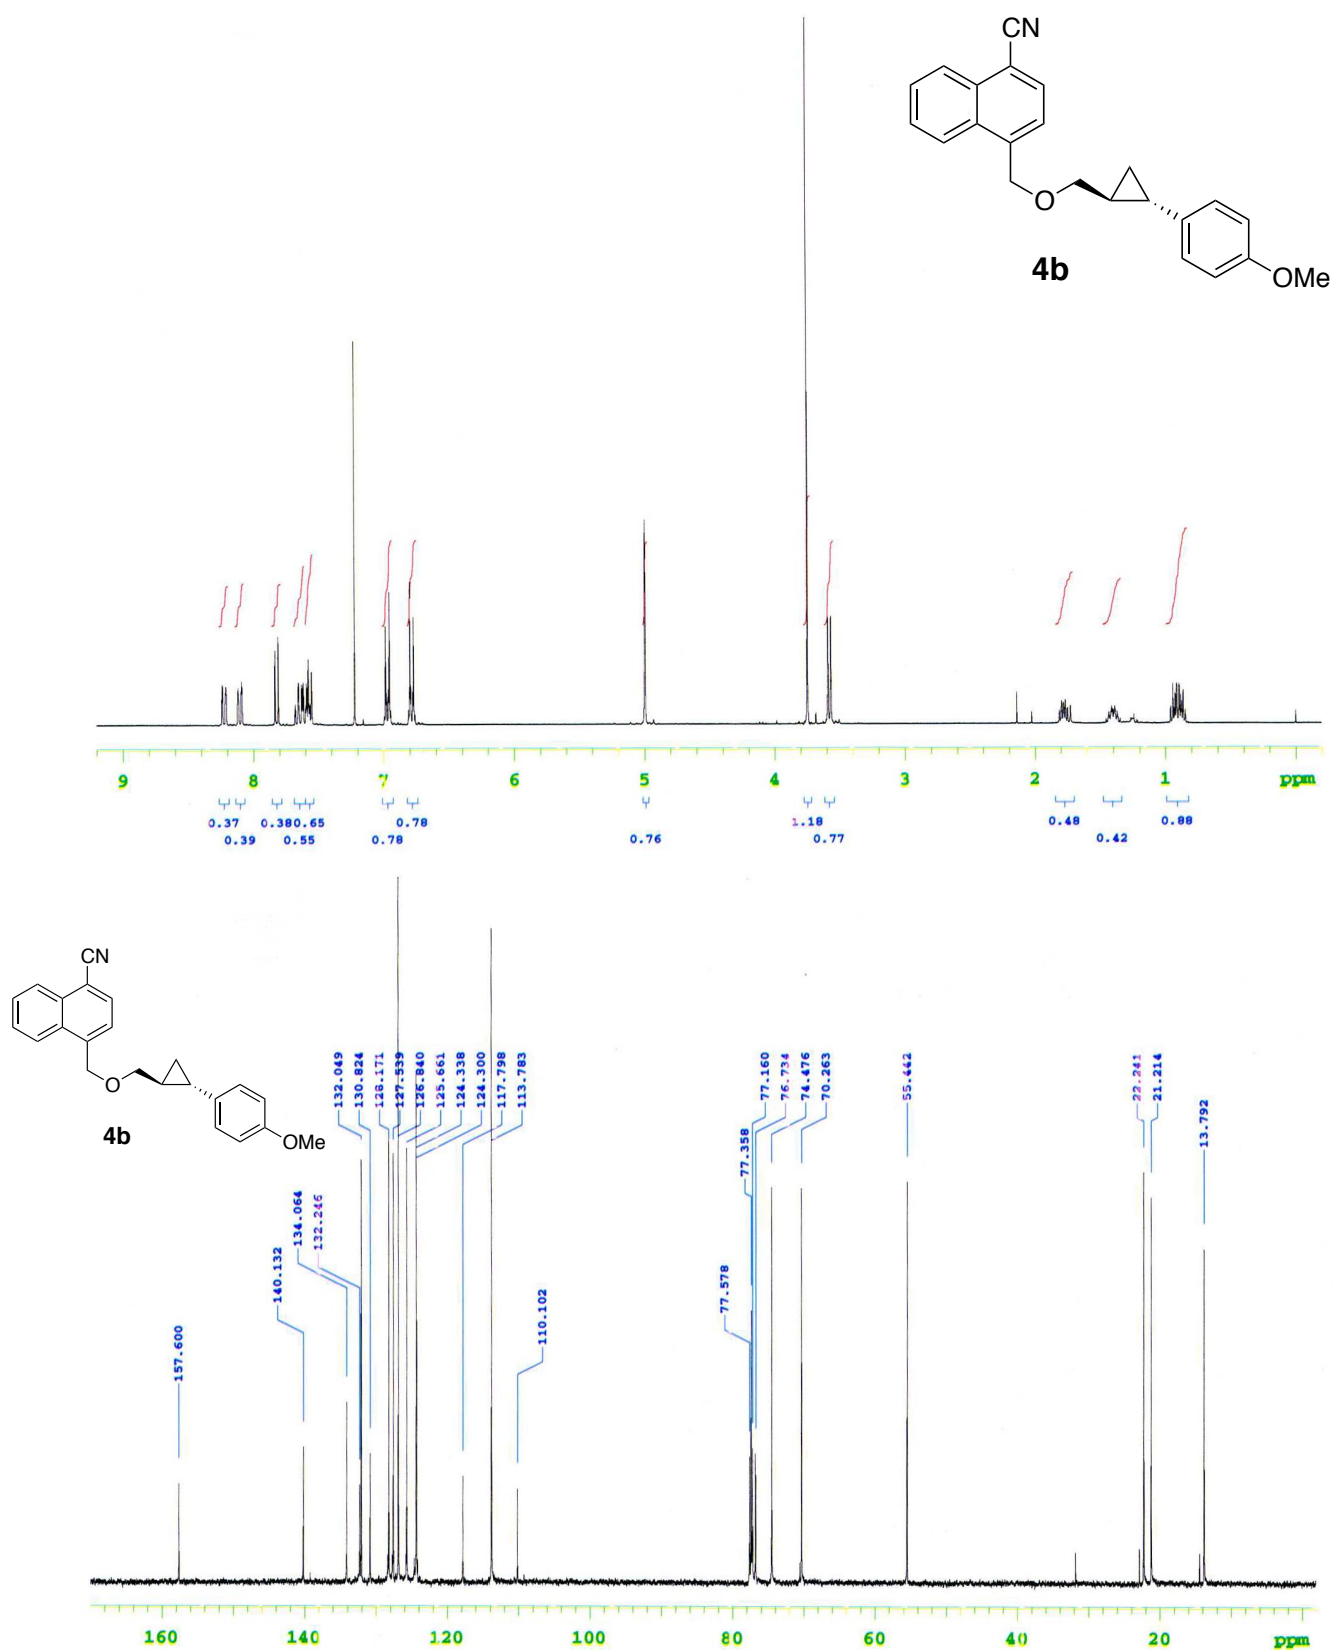

Figure S9. <sup>1</sup>H and <sup>13</sup>C NMR spectra of **4b** in CDCl<sub>3</sub>.

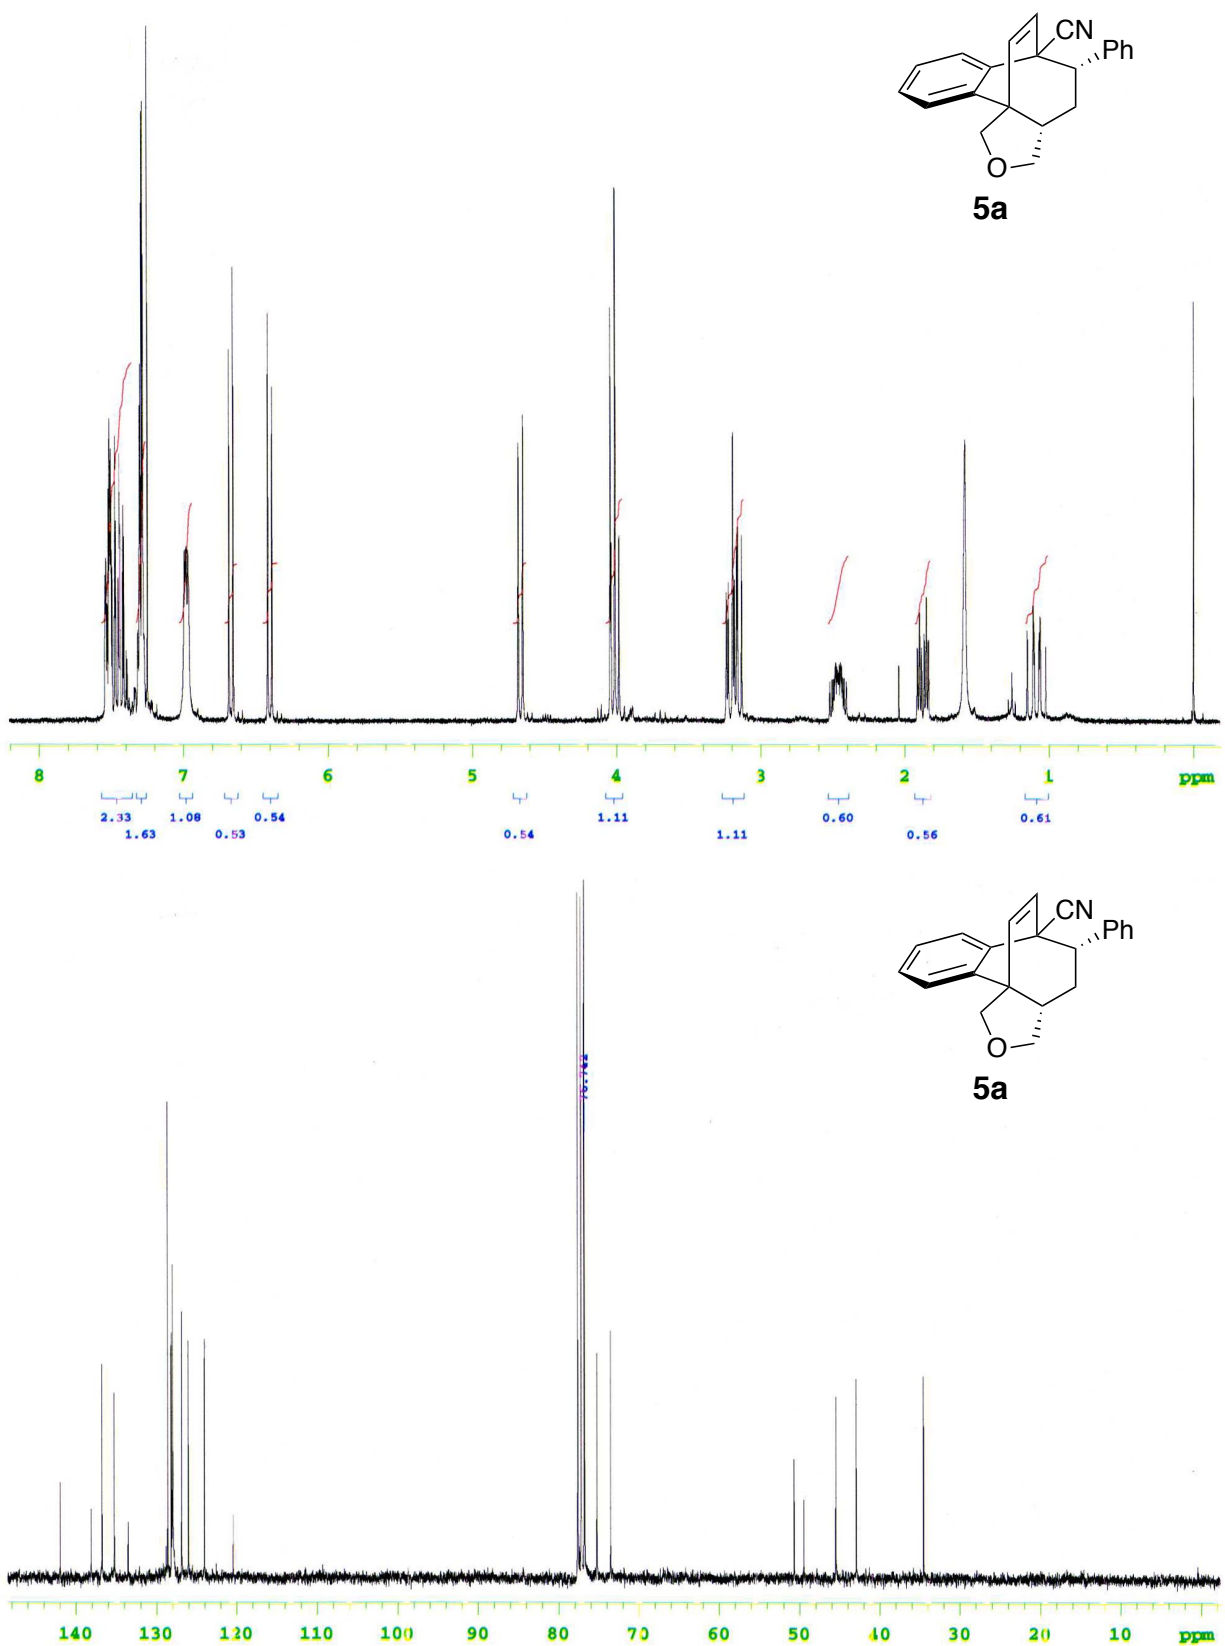

**Figure S10.**  $^1\text{H}$  and  $^{13}\text{C}$  NMR spectra of **5a** in  $\text{CDCl}_3$ .

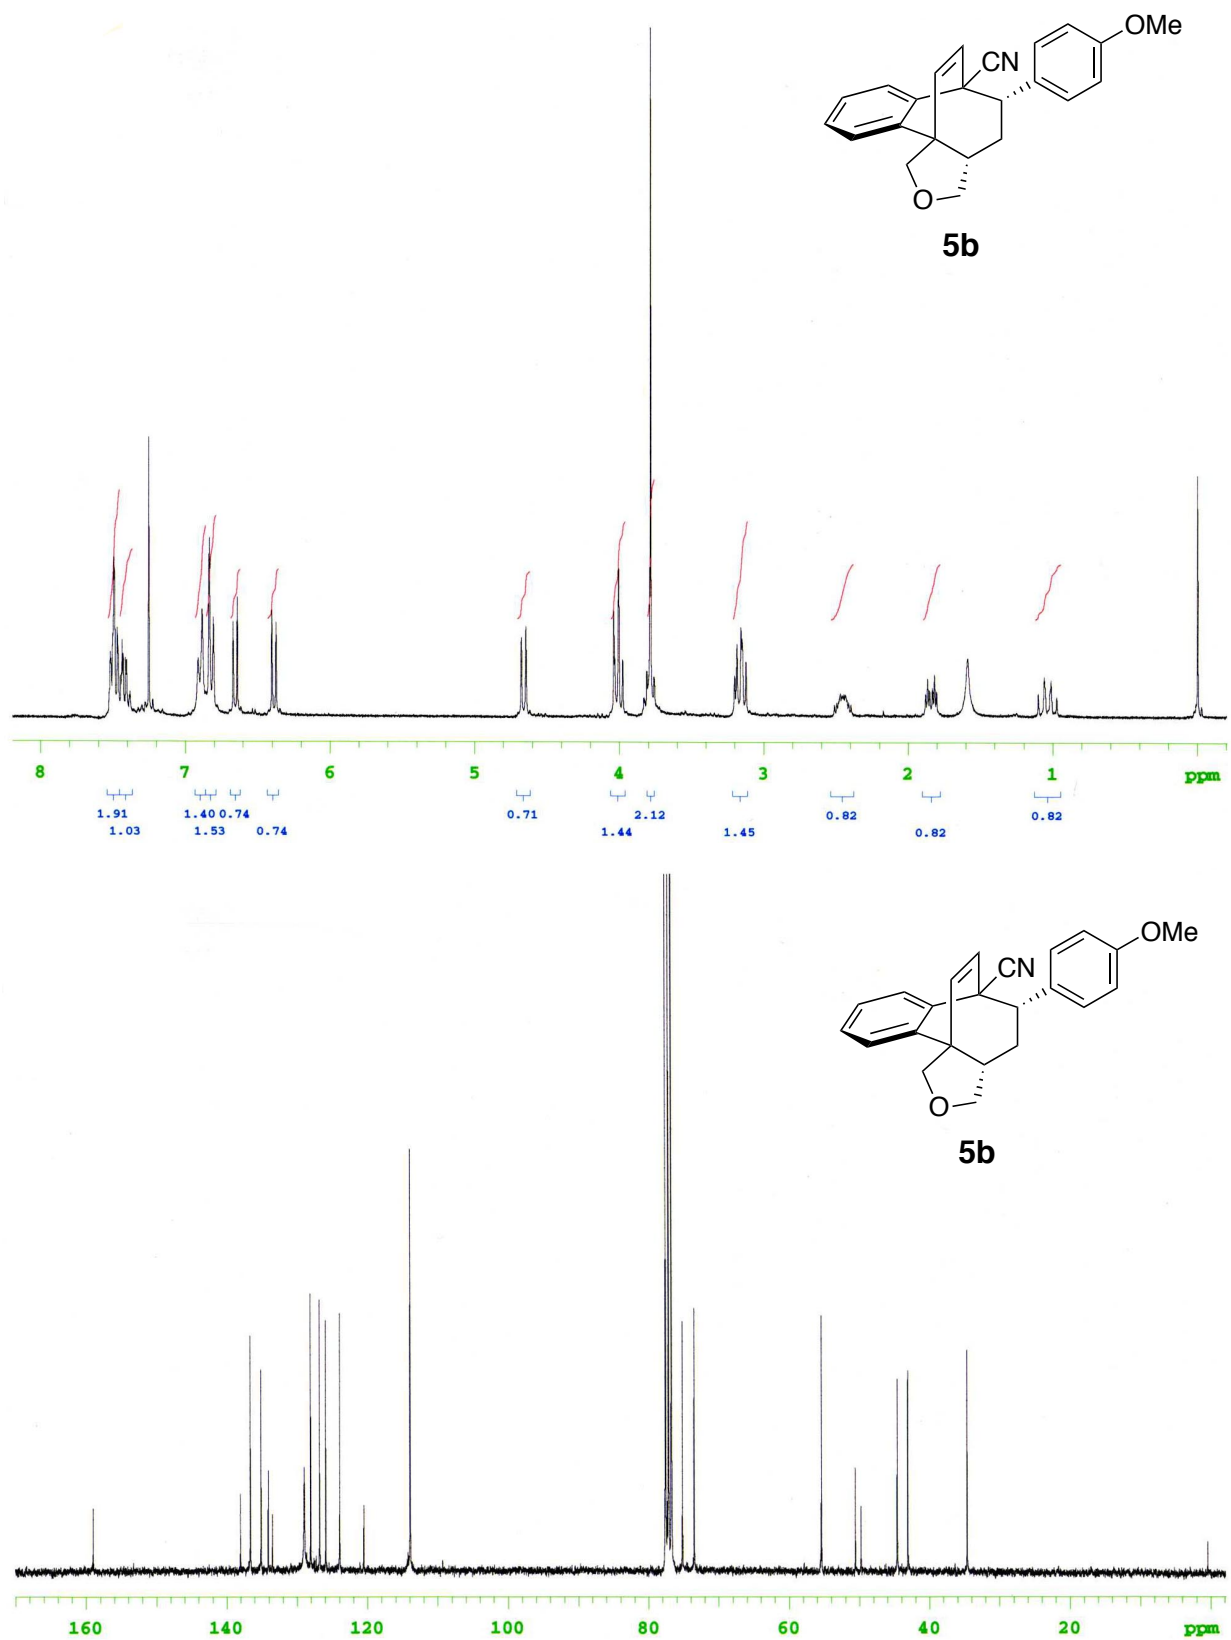

**Figure S11.**  $^1\text{H}$  and  $^{13}\text{C}$  NMR spectra of **5b** in  $\text{CDCl}_3$ .

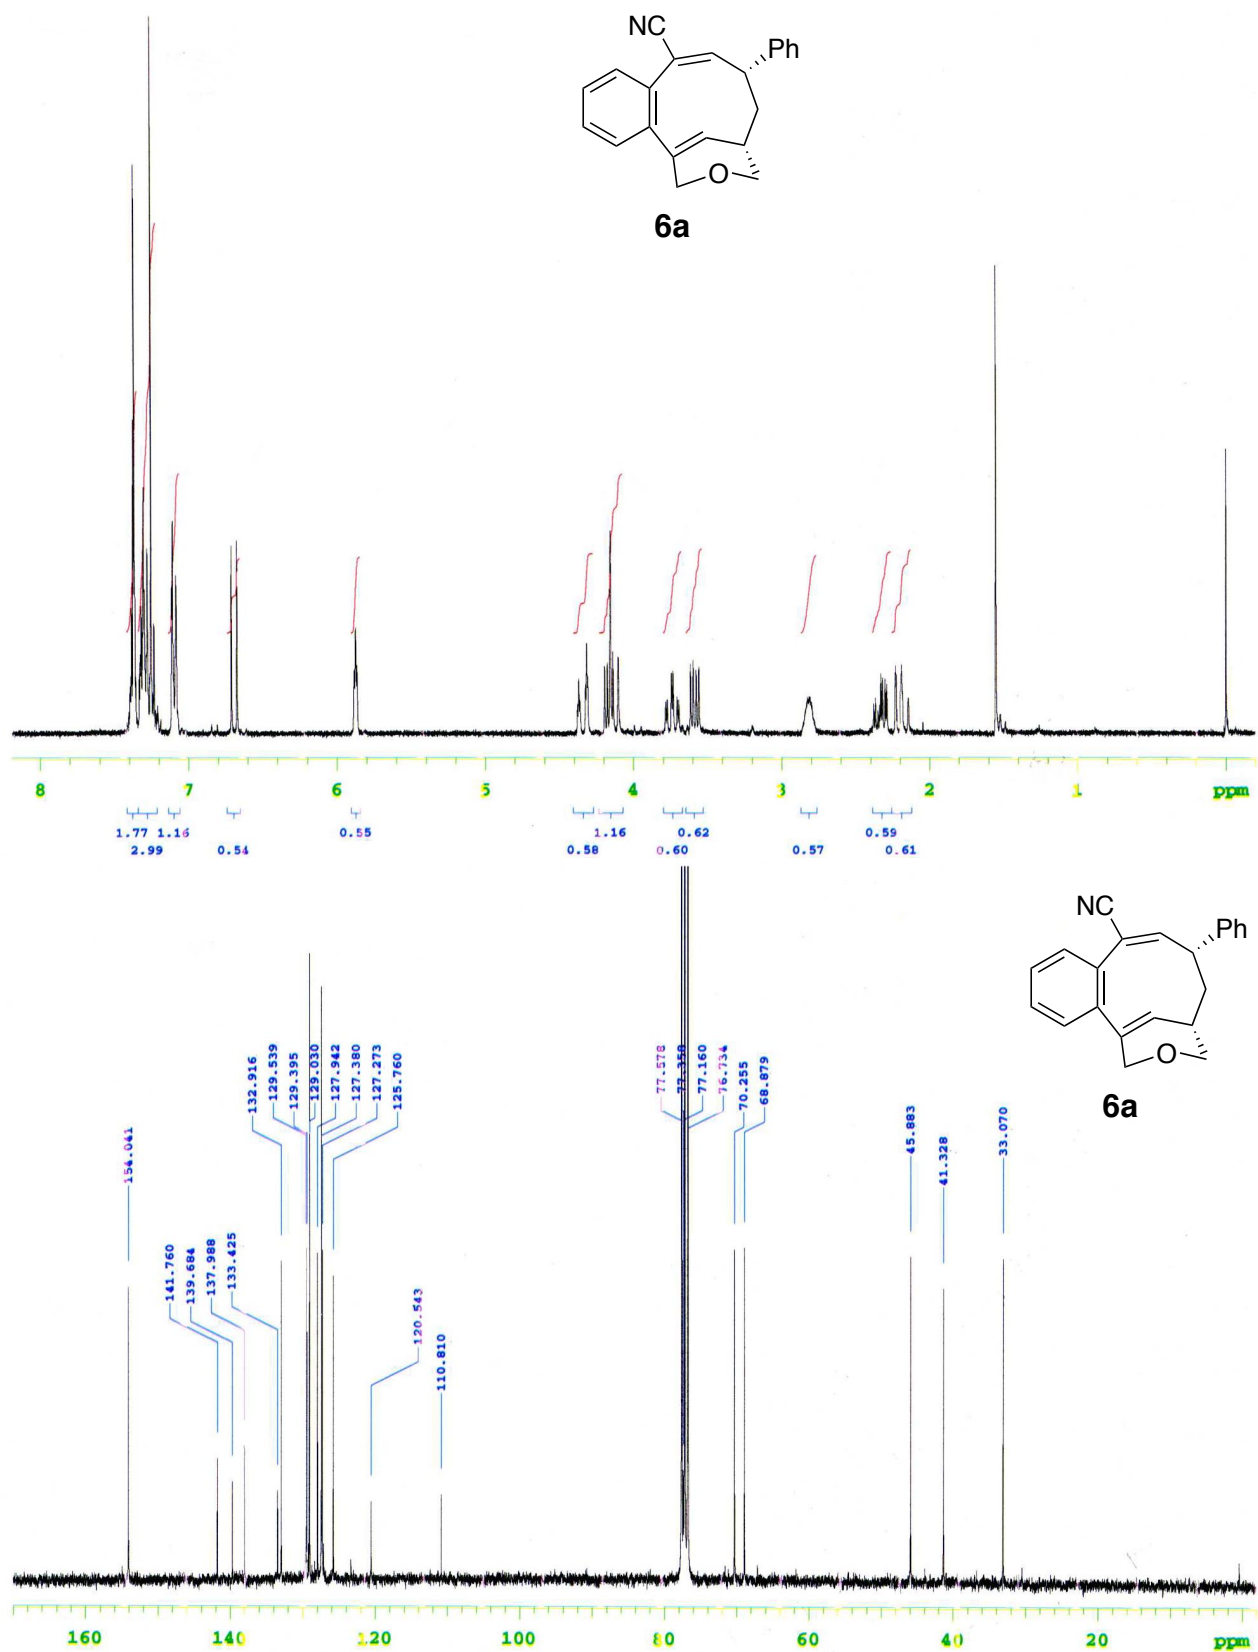

**Figure S12.** <sup>1</sup>H and <sup>13</sup>C NMR spectra of **6a** in CDCl<sub>3</sub>.

## X-ray crystallographic analysis

Single crystals were mounted on glass fibers. X-ray crystallographic data for single crystals were obtained using a Rigaku RAXIS RAPID imaging plate area detector with graphite monochromated Mo-K $\alpha$  radiation. The data were collected at room temperature to a maximum  $2\theta$  value of 55. The initial phases were solved by direct methods (SIR92) and the structure was modeled by using Fourier technique. The non-hydrogen atoms were refined anisotropically. Hydrogen atoms were refined by using the riding model. All calculations were performed using the Crystal Structure crystallographic software package.

**Table S1.** Crystal Parameters and Refinement Matrices

|                                                | <b>2a</b>                          | <b>endo-3a</b>                     | <b>exo-3a</b>                      | <b>5a</b>                          | <b>6a</b>                          |
|------------------------------------------------|------------------------------------|------------------------------------|------------------------------------|------------------------------------|------------------------------------|
| formula                                        | C <sub>22</sub> H <sub>19</sub> NO |
| mol wt                                         | 313.40                             | 313.40                             | 313.40                             | 313.40                             | 313.40                             |
| cryst dimens / mm                              | 2.0 x 0.7 x 0.4                    | 0.4 x 0.3 x 0.2                    | 1.2 x 1.2 x 0.6                    | 1.0 x 0.3 x 0.3                    | 0.7 x 0.3 x 0.3                    |
| cryst system                                   | monoclinic                         | monoclinic                         | monoclinic                         | monoclinic                         | monoclinic                         |
| space group                                    | <i>P</i> 2 <sub>1</sub> / <i>c</i> | <i>Cc</i>                          | <i>P</i> 2 <sub>1</sub> / <i>c</i> | <i>P</i> 2 <sub>1</sub> / <i>c</i> | <i>P</i> 2 <sub>1</sub> / <i>n</i> |
| <i>a</i> / Å                                   | 11.3188(8)                         | 11.1593(16)                        | 15.2555(13)                        | 14.9288(10)                        | 10.9564(16)                        |
| <i>b</i> / Å                                   | 11.0322(8)                         | 9.9827(16)                         | 10.9576(8)                         | 6.6208(6)                          | 11.3121(13)                        |
| <i>c</i> / Å                                   | 13.3367(9)                         | 30.073(4)                          | 21.576(2)                          | 17.0406(12)                        | 14.0228(19)                        |
| $\alpha$ / deg                                 | 90                                 | 90                                 | 90                                 | 90                                 | 90                                 |
| $\beta$ / deg                                  | 92.0346(17)                        | 95.774(3)                          | 110.768(3)                         | 104.5303(18)                       | 90.834(4)                          |
| $\gamma$ / deg                                 | 90                                 | 90                                 | 90                                 | 90                                 | 90                                 |
| <i>V</i> / Å <sup>3</sup>                      | 1664.3(2)                          | 3333.1(9)                          | 3372.4(5)                          | 1630.4(2)                          | 1737.8(4)                          |
| <i>Z</i>                                       | 4                                  | 8                                  | 8                                  | 4                                  | 4                                  |
| <i>D</i> <sub>calcd</sub> / g cm <sup>-3</sup> | 1.251                              | 1.249                              | 1.235                              | 1.277                              | 1.198                              |
| temp / K                                       | 293                                | 296                                | 293                                | 293                                | 293                                |
| $\mu$ (Mo-K $\alpha$ ) / mm <sup>-1</sup>      | 0.076                              | 0.076                              | 0.075                              | 0.078                              | 0.073                              |
| $2\theta$ <sub>max</sub> / deg                 | 54.84                              | 54.79                              | 54.96                              | 54.86                              | 54.86                              |
| no. of reflections measured                    | 3784 (Total)                       | 6901 (Total)                       | 7555 (Total)                       | 3696 (Total)                       | 3959 (Total)                       |
|                                                | 2430 (Unique)                      | 3167 (Unique)                      | 3918 (Unique)                      | 2385 (Unique)                      | 1809 (Unique)                      |
| no. observations                               | 2448                               | 6901                               | 4355                               | 2385                               | 2227                               |
| no. variables                                  | 236                                | 433                                | 471                                | 236                                | 236                                |
| rfln/parameter ratio                           | 10.37                              | 15.93                              | 9.25                               | 10.11                              | 9.44                               |
| <i>R</i>                                       | 0.0699                             | 0.0937                             | 0.0731                             | 0.0632                             | 0.1016                             |
| <i>R</i> <sub>w</sub>                          | 0.1416                             | 0.3157                             | 0.0907                             | 0.0832                             | 0.1279                             |
| goodness of fit                                | 0.951                              | 1.288                              | 1.133                              | 1.284                              | 1.494                              |
| structure solution                             | SIR92                              | SIR92                              | SIR92                              | SIR92                              | SIR92                              |

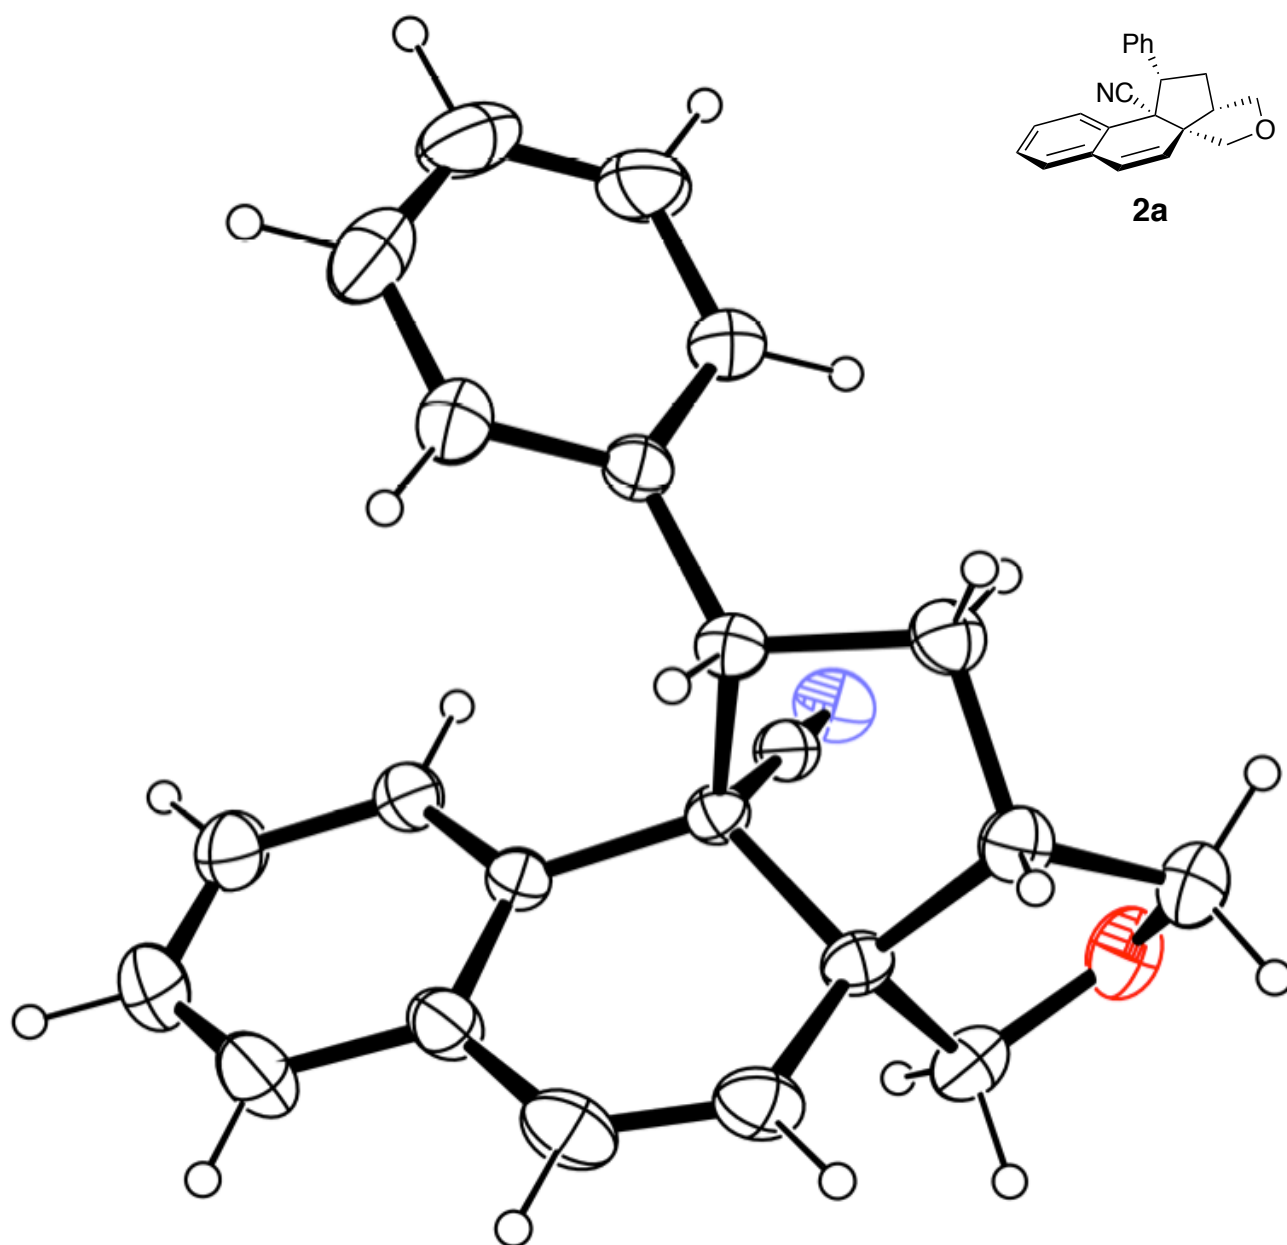

**Figure S13.** ORTEP plot of X-ray crystallographic data of **2a** (ellipsoids at 30% probability).

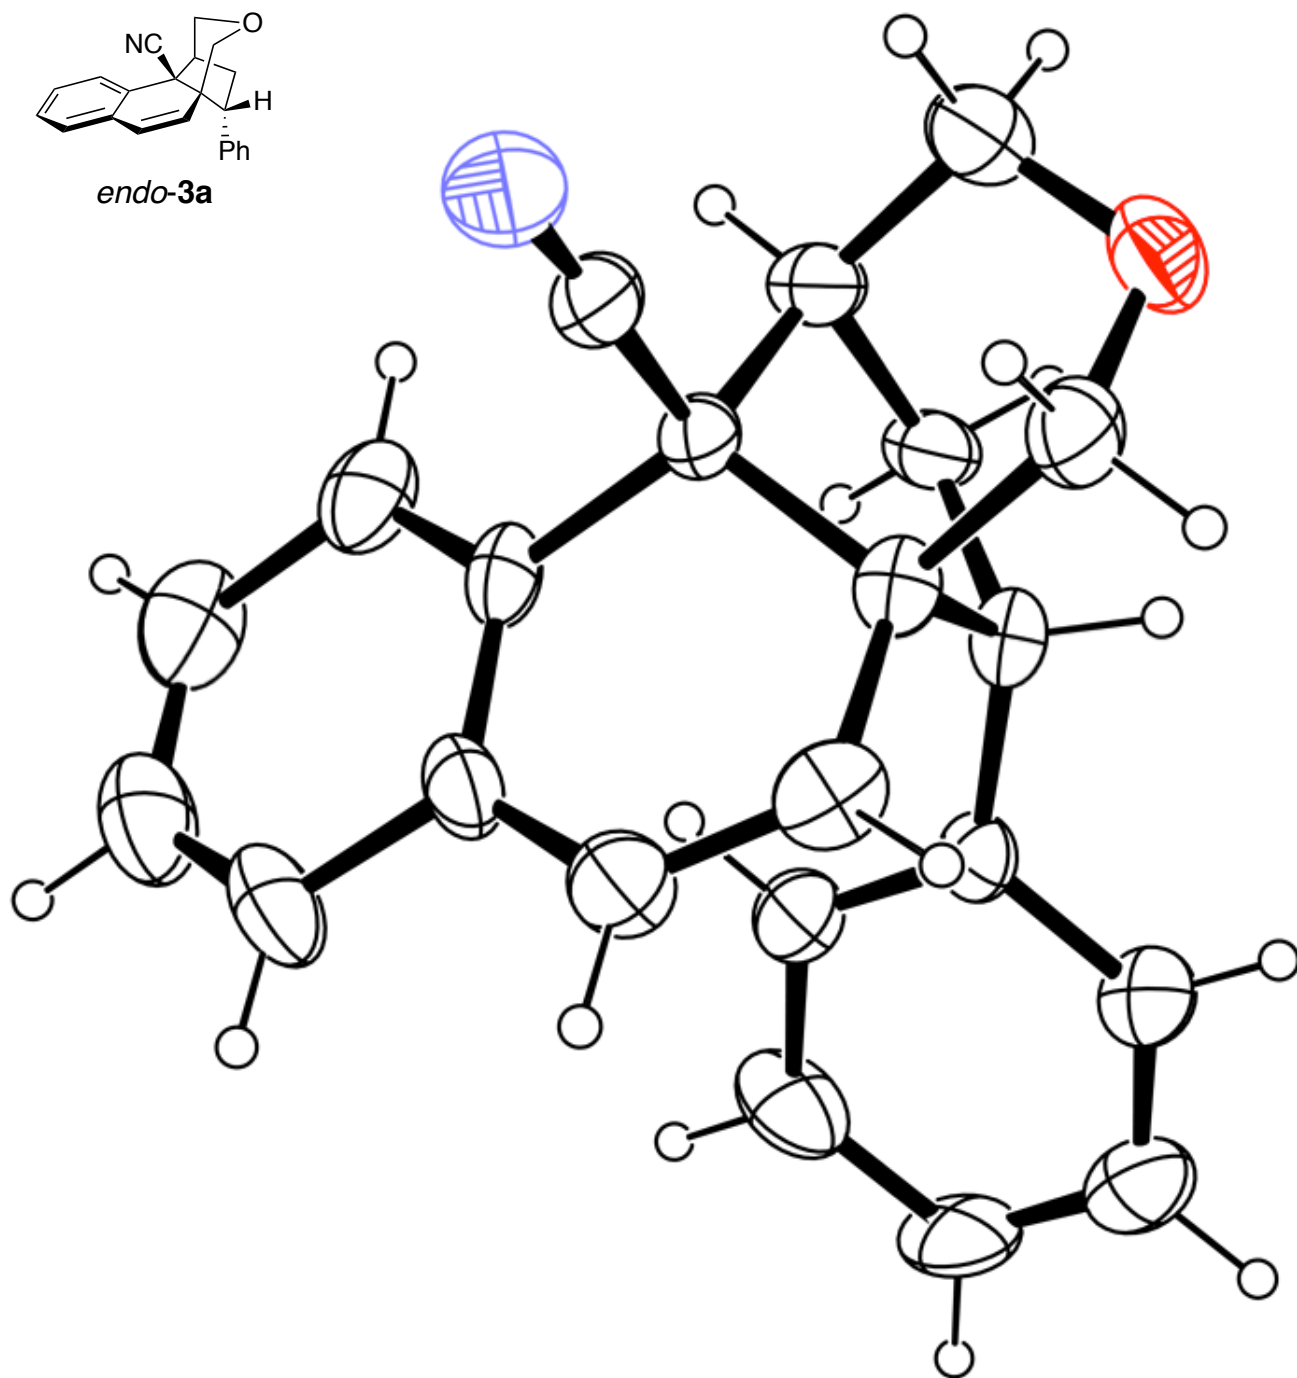

**Figure S14.** ORTEP plot of X-ray crystallographic data of *endo-3a* (ellipsoids at 30% probability).



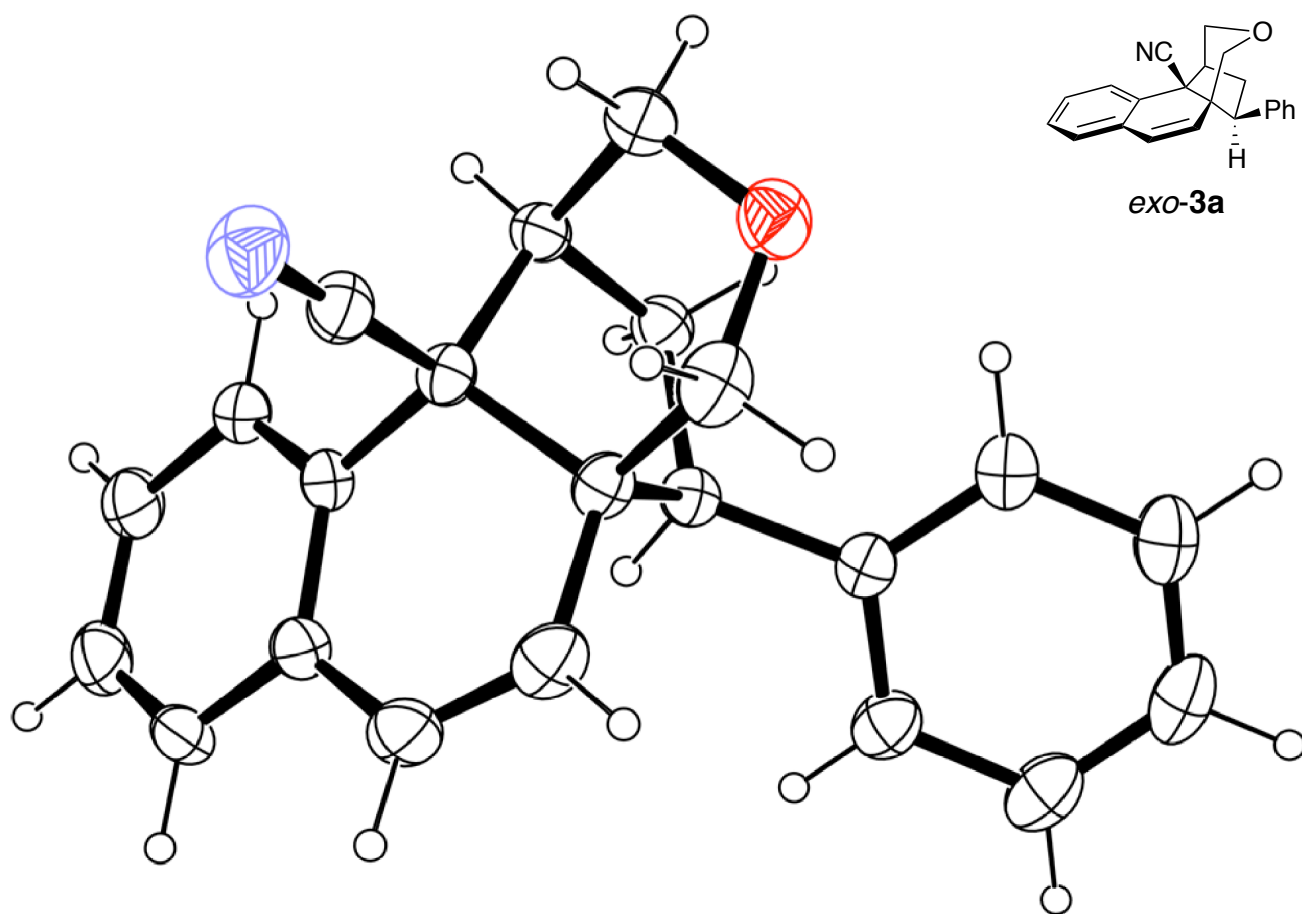

**Figure S15.** ORTEP plot of X-ray crystallographic data of *exo-3a* (ellipsoids at 30% probability).

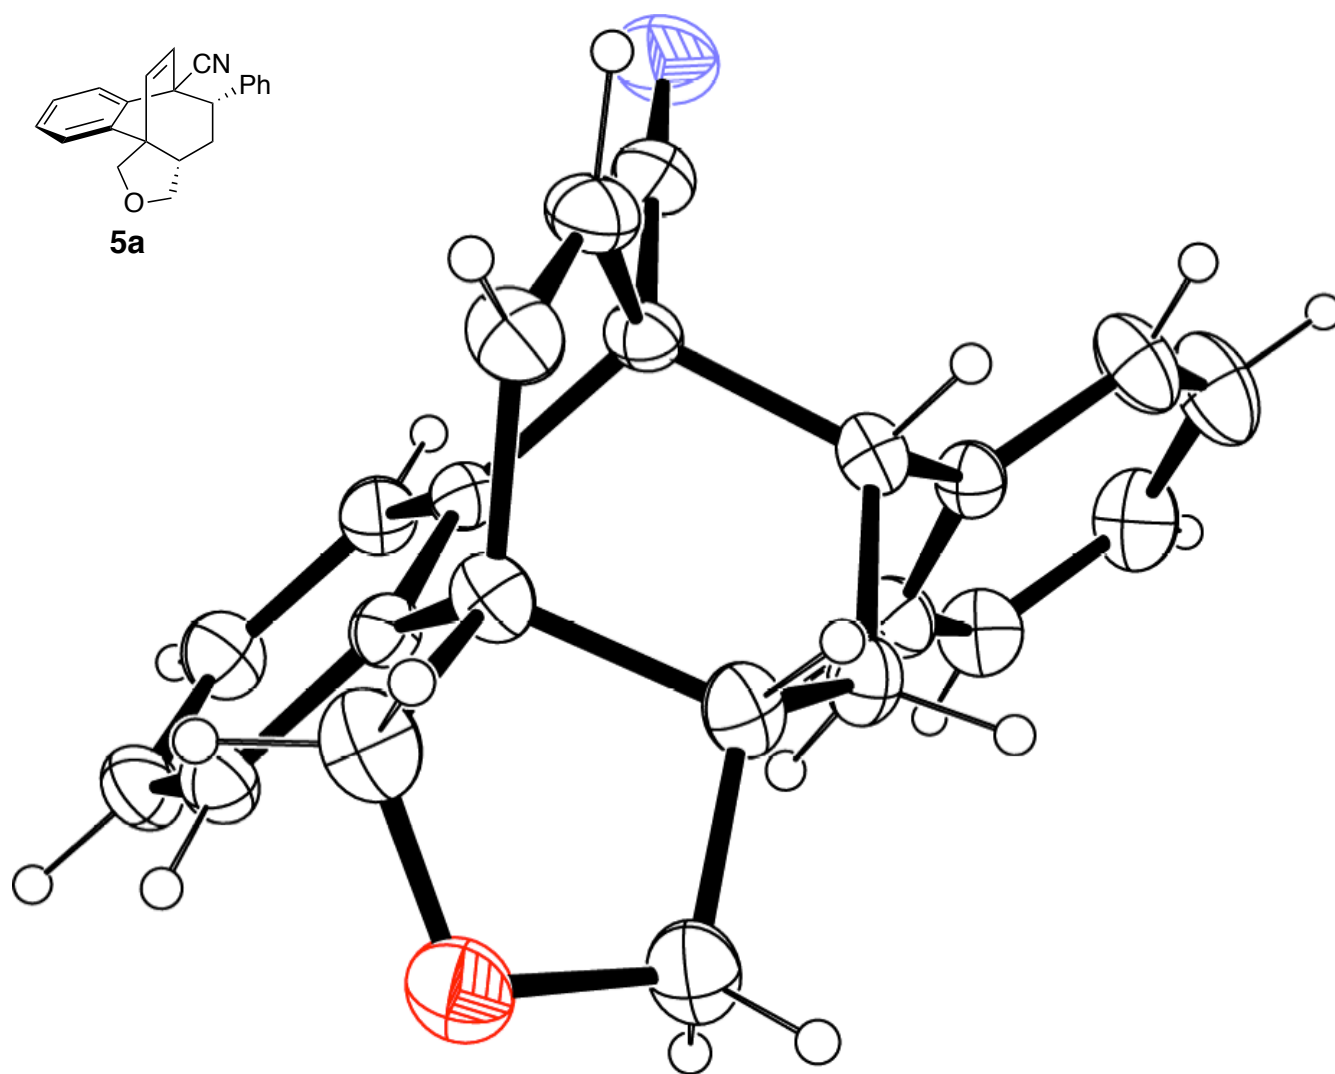

**Figure S16.** ORTEP plot of X-ray crystallographic data of **5a** (ellipsoids at 30% probability).

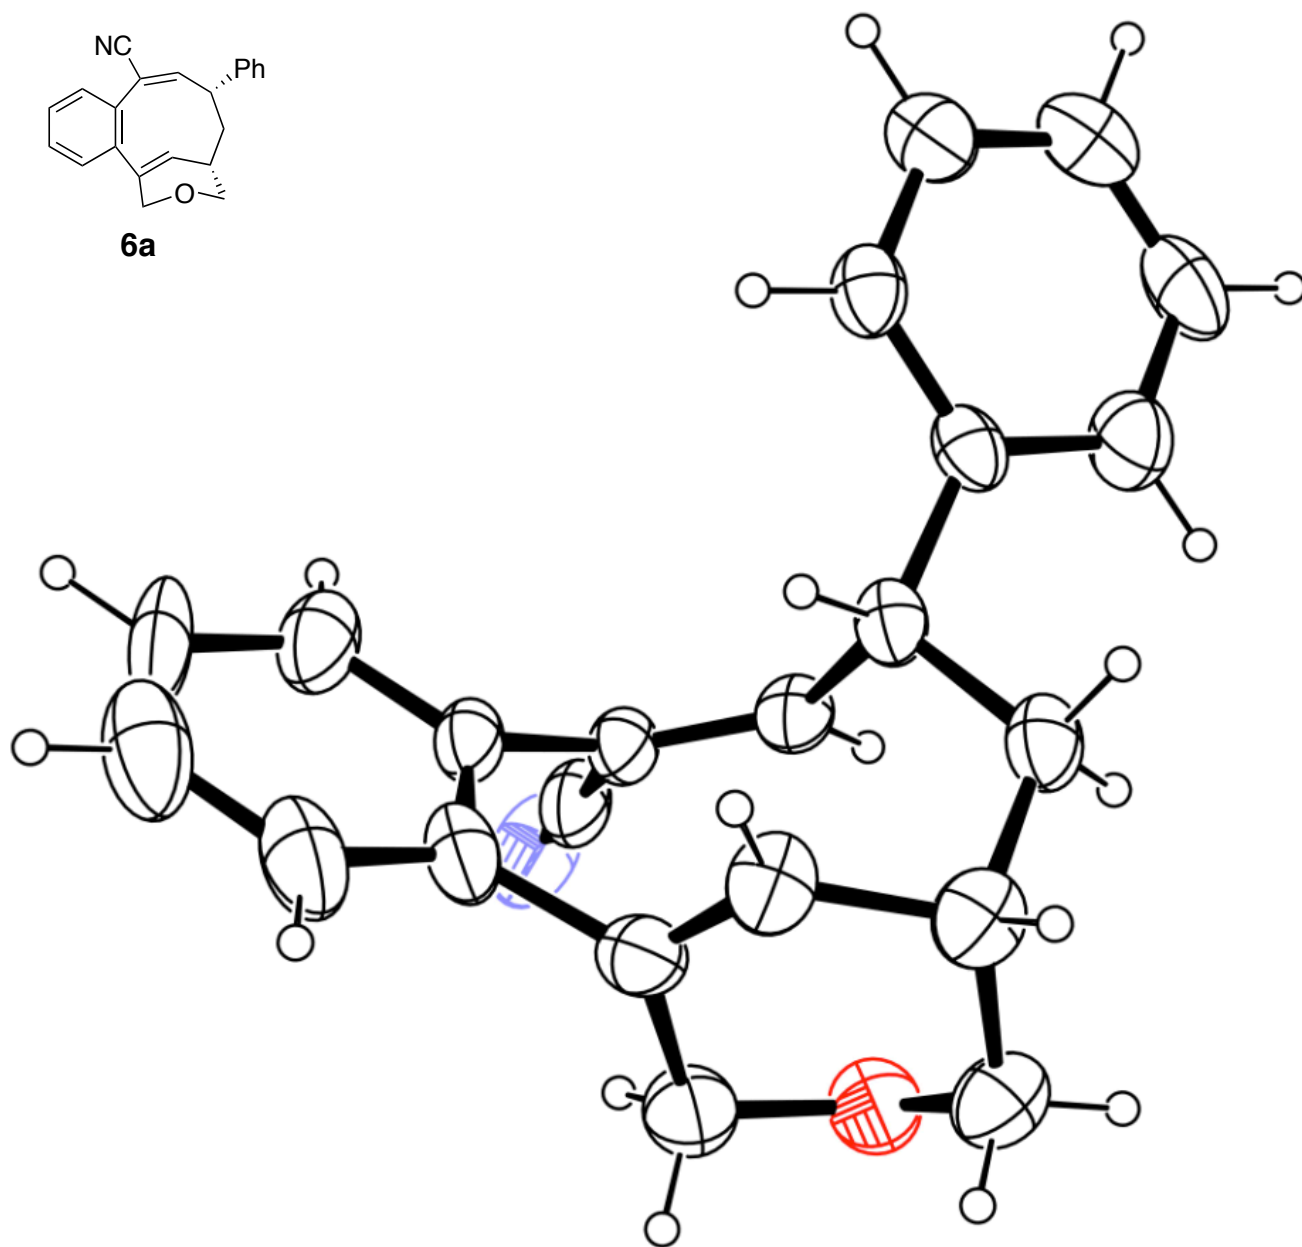

**Figure S17.** ORTEP plot of X-ray crystallographic data of **6a** (ellipsoids at 30% probability).
